# Supplementary material for: Cholic acid-based fluorescent probes for enantioselective recognition of trifunctional amino acids
Source: Royal Society of Chemistry journal article supplement (doi:10.1039/b717544b), 2008-01-01
Supplement: b717544b.pdf [file b717544b.pdf]

## Supporting Information for

# Cholic acid-based fluorescent probe for enantioselective recognition of trifunctional aminoacids

Hao Wang, Wing-Hong Chan\* and Albert W. M. Lee

Department of Chemistry, Hong Kong Baptist University, Kowloon Tong, Hong Kong  
SAR, China

1. Binding saturation curves based on  $^1\text{H}$  NMR titrations of sensor **1a** with antipodal forms of serine

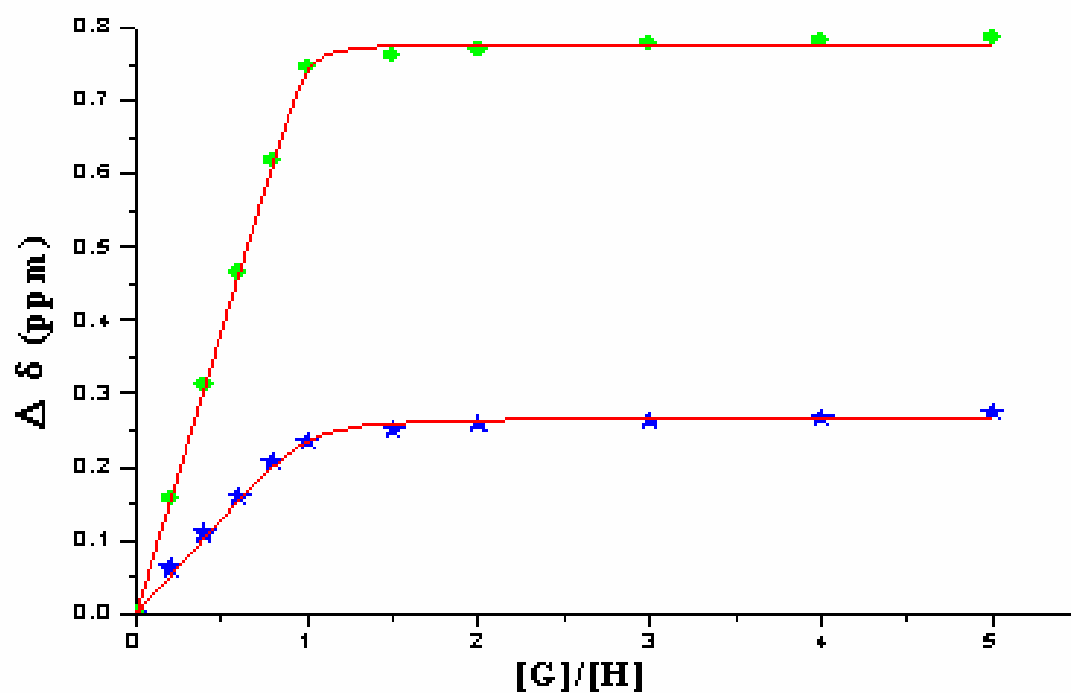

**S-Figure 1.** Binding saturation curves based on  $^1\text{H}$  NMR titrations of sensor **1a** with L-serine (★) and D-serine (●) in  $\text{CD}_3\text{CN}$ ,  $[\mathbf{1a}] = 2\text{mM}$ .  $\Delta\delta$  is the complexation induce shift (CIS) difference of the anthracenylmethylene protons of **1a** after an aliquot of guest has been added compared to before any guest addition

**S-Table 1.** Association constants  $K_{\text{ass}}$  ( $\text{M}^{-1}$ ) and relative coefficients (R) of sensor **1a**

with L-serine and D-serine in  $\text{CD}_3\text{CN}$  at  $25^\circ\text{C}$  as determined by  $^1\text{H}$  NMR titration

| guests   | $K_{\text{ass}}$ ( $\text{M}^{-1}$ ) <sup>a</sup> | R <sup>a</sup> | $\delta_{\text{max}}$ <sup>b</sup> (ppm) |
|----------|---------------------------------------------------|----------------|------------------------------------------|
| L-serine | $(3.18 \pm 0.21) \times 10^4$                     | 0.9942         | 0.29                                     |
| D-serine | $(2.44 \pm 0.06) \times 10^5$                     | 0.9963         | 0.79                                     |

<sup>a</sup> The values were calculated using the 1:1 binding isotherm by iterative curve-fitting methods described elsewhere<sup>ref. 9</sup>. <sup>b</sup>  $\delta_{\text{max}}$  is the saturated CIS calculated by the iterative methods.

2. Free energy difference of the diastereomeric binding of **1a** with antipodal forms of trifunctional aminoacids

**S-Table 2.** Diastereomeric binding of **1a** with antipodal forms of serine, threonine, lysine and tyrosine

| aminoacids  | Host <b>1a</b>     |                        |                             | Host <b>1c</b>     |                        |                             |
|-------------|--------------------|------------------------|-----------------------------|--------------------|------------------------|-----------------------------|
|             | - $\Delta\text{G}$ | $\Delta\Delta\text{G}$ | $K_{\text{D}}/K_{\text{L}}$ | - $\Delta\text{G}$ | $\Delta\Delta\text{G}$ | $K_{\text{L}}/K_{\text{D}}$ |
| L-serine    | 6.09               |                        |                             | 7.12               | 1.06                   | 6.2                         |
| D-serine    | 7.20               | 1.11                   | 6.7                         | 6.06               |                        |                             |
| L-threonine | 5.80               |                        |                             | 6.98               | 1.23                   | 8.1                         |
| D-threonine | 7.07               | 1.27                   | 8.9                         | 5.75               |                        |                             |
| L-lysine    | 5.69               |                        |                             | 6.71               | 1.17                   | 7.4                         |
| D-lysine    | 6.91               | 1.22                   | 8.1                         | 5.54               |                        |                             |
| L-tyrosine  | 5.93               |                        |                             | 7.05               | 1.05                   | 7.2                         |
| D-tyrosine  | 7.11               | 1.18                   | 7.5                         | 5.90               |                        |                             |

3. **S-Figure 2** Molecular modeling studies for the host-guest complex conducted by SPARAN 04

Complex **1a** - *D-serine* (additional H-bond formed between one of the hydrogen of the  $\alpha$ -amino group of *D-serine* and the C-12 pendant ester oxygen atom)

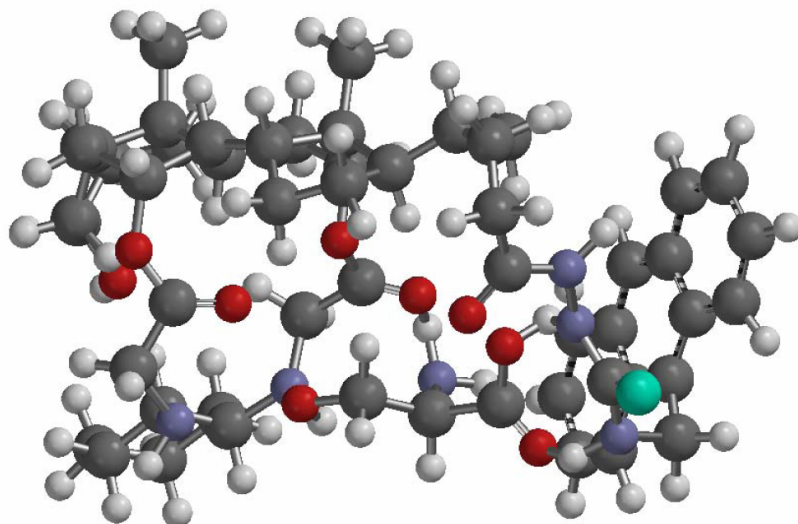

Complex **1a** - *L-serine* with the  $\alpha$ -amino group of *L-serine* pointing away from the core portion of cholic acid derivative

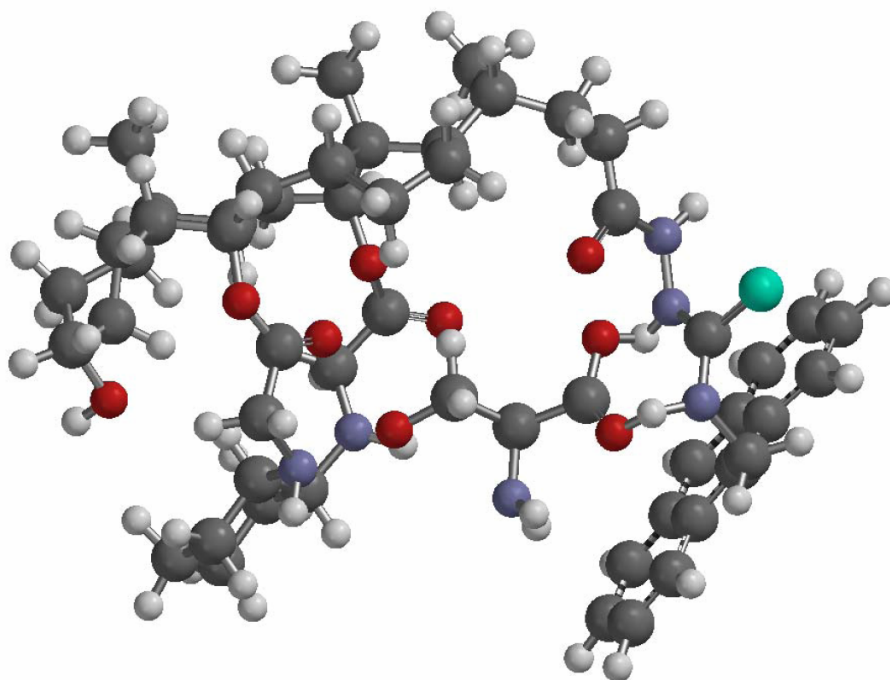

4. Solvent effect on the binding properties of **1a** to D- and L-serine

**S-Table 3** Association constants  $K_{ass}$  ( $M^{-1}$ ) of sensor **1a** with serine in different solvent systems

| Solvent                                 | D-serine                      | L-serine                      | $K_D/K_L$ |
|-----------------------------------------|-------------------------------|-------------------------------|-----------|
| CH <sub>3</sub> CN                      | $(2.26 \pm 0.17) \times 10^5$ | $(3.36 \pm 0.23) \times 10^4$ | 6.7       |
| CH <sub>3</sub> CN:H <sub>2</sub> O=8:2 | $(9.33 \pm 0.31) \times 10^4$ | $(1.73 \pm 0.11) \times 10^4$ | 5.4       |
| CH <sub>3</sub> CN:H <sub>2</sub> O=6:4 | $(4.95 \pm 0.20) \times 10^4$ | $(1.05 \pm 0.06) \times 10^4$ | 4.7       |
| CH <sub>3</sub> CN:H <sub>2</sub> O=5:5 | $(3.57 \pm 0.26) \times 10^4$ | $(8.71 \pm 0.42) \times 10^3$ | 4.1       |
